# Supplementary material
Source: HighWire-hosted journal article supplement (https://bmjophth.bmj.com/content/3/1/e000104)
Supplement: inline-supplementary-material-1 [file inline-supplementary-material-1.docx]

| Table 1 – Subject Demographics and Cause of Trauma | | | | | | |  |
| --- | --- | --- | --- | --- | --- | --- | --- |
| Patient | Age / Gender | Cause of Trauma | Chief Complaint | VA  (OD, OS) | Time from Trauma to Imaging | Eye Imaged | Clinically Diagnosed Commotio Retinae |
| KS_0552 | 47 / M | Industrial accident blast | Relative scotoma, OD | 20/20, 20/20 | 8 y | OD | Yes |
| CW_10303 | 17 / F | MVC w/ airbag | Blurry vision, OS | 20/16, 20/16 | 14 d | OS | Yes |
| SR_10341 | 23 / M | Fall - from balcony | Blurry vision, OU | 20/13, 20/16 | 13 m | OS | No |
| DH_10342 | 25 / M | Fall - on head at work | Blurry vision, OS | 20/20, 20/20 | 7 m | OD | No |
| JC_10451 | 24 / F | Fall - on head during sports | Light sensitivity, headache with visual tasks | 20/20, 20/25 | 6 m | OU | No |
| TH_10619 | 32 / M | Combat-related blast | Light sensitivity | 20/25, 20/25 | 10 y | OD | No |
| WW_0923 | 24 / M | MVC w/ airbag | Relative scotoma, OS | 20/13, 20/25 | 4 y | OS | Yes |
| OS, left eye; OD, right eye; OU, both eyes; VA, visual acuity; MVC, motor vehicle collision;  y, year; m, month; d, day | | | | |  |  |  |
